# Supplementary material for: What are the Differences in Injury Proportions Between Different Populations of Runners? A Systematic Review and Meta-Analysis
Source: PubMed Central journal article supplement (PMC4513221; doi:10.1007/s40279-015-0331-x), 2015-04-08
Supplement: 40279_2015_331_MOESM2_ESM.pdf [file 40279_2015_331_MOESM2_ESM.pdf]

**Electronic Supplementary Material Appendix S2.** Checklist for the risk-of-bias assessment

---

*Study objective*

---

- 1 Positive, if the study had a clearly defined objective and the main purpose was to investigate injury occurrence in runners.
- 

*Study population*

---

- 2 Positive, if the main features of the study population are described (sampling frame and demographic characteristics: gender, age and BMI).
  - 3 Positive, if the participation rate is at least 80%, or if the participation rate is 60-80% and the non-response is not selective (data shown).
  - 4 Positive, if the participation rate of the included subjects at main moment of follow-up is at least 80% or if the non-response is not selective (data shown).
- 

*Assessment of the outcome*

---

- 5 Positive, if the time period on which the injury proportion was based is defined or the injury incidence was expressed in terms of exposure.
  - 6 Method for assessing injury status: physical examination (+); self-reported: specific questions relating to symptoms/disease/use of body chart (+), self-reported: single question (-).
  - 7 Positive, when the definition of injury was defined.
  - 8 Positive, if the recall period was less than or equal to a month.
-
