# Supplementary material for: What are the Differences in Injury Proportions Between Different Populations of Runners? A Systematic Review and Meta-Analysis
Source: PubMed Central journal article supplement (PMC4513221; doi:10.1007/s40279-015-0331-x), 2015-04-08
Supplement: 40279_2015_331_MOESM3_ESM.pdf [file 40279_2015_331_MOESM3_ESM.pdf]

**Electronic Supplementary Material Appendix S3.** Descriptives of the included studies.

| Authors (year)                  | Population of runners                                    | Study design | Included / analyzed (%)                                                              | Description of population                                                                                        | Injury definition                                                                                                                                                                                           | Injury assessment        | ROB (%) |
|---------------------------------|----------------------------------------------------------|--------------|--------------------------------------------------------------------------------------|------------------------------------------------------------------------------------------------------------------|-------------------------------------------------------------------------------------------------------------------------------------------------------------------------------------------------------------|--------------------------|---------|
| Lysholm & Wiklander (1987) [27] | 1) Sprint<br>2) Middle                                   | PC           | 1) 19/19 (100.0)<br>2) 13/13 (100.0)                                                 | 1) M/F: 12/7<br>Age: 20.6 ± 3.8<br>2) M/F: 9/4<br>Age: 18.6 ± 2.4                                                | All: “Any injuries that markedly hampered training or competition for at least 1 week.”                                                                                                                     | Diagnosis                | 75.0    |
| D’Souza (1994) [18]             | 1) Sprint<br>2) Middle                                   | RC           | 1) 40/40 (100.0)<br>2) 27/27 (100.0)                                                 | M/F: 96/51 #<br>Age: 18 ± 2.5 #                                                                                  | All: An injury that lasted more than or is equal to 1 week.                                                                                                                                                 | Self-reported            | 37.5    |
| Bennell et al. (1995) [28]      | 1) Sprint<br>2) Middle                                   | PC           | 1) 19/16 (84.2)<br>2) 40/35 (87.5)                                                   | M/F: 1) 11/5<br>2) 18/17<br>Age: 20.3 ± 2.0 (M);<br>20.5 ± 2.2 (F) #<br>BMI: 21.8 ± 1.7 (M);<br>21.1 ± 1.8 (F) # | Stress fractures: “Any musculoskeletal pain or injury that resulted from athletic training and caused alteration of normal training mode, duration, intensity, or frequency for 1 week or more.”            | Self-reported, Diagnosis | 87.5    |
| Bennell et al. (1995) [17]      | 1) Sprint<br>2) Middle<br>3) Long                        | RC           | 1) 6/6 (100.0)<br>2) 20/20 (100.0)<br>3) 10/10 (100.0)                               | 1) M/F: 0/6<br>2) M/F: 0/20<br>3) M/F: 0/10                                                                      | Stress fractures: “Stress fractures that were diagnosed by a physician based on history and physical examination and confirmed by positive isotope bone scan, radiography, or computerized tomography.”     | Self-reported, Diagnosis | 62.5    |
| Sugiura et al. (2008) [39]      | Sprint (elite)                                           | PC           | 42/30 (71.4)                                                                         | M/F: 30/0<br>Age: 20.2 ± 1.3<br>BMI: 22.1                                                                        | Hamstring: An incident of a hamstring injury that caused the sprinter to miss at least 1 week of training or competition.                                                                                   | Diagnosis                | 75.0    |
| Alonso et al. (2009) [29]       | 1) Sprint<br>2) Middle<br>3) Long<br>4) Marathon (elite) | PC           | 1) 327/327 (100.0)<br>2) 172/172 (100.0)<br>3) 101/101 (100.0)<br>4) 151/151 (100.0) | 1) M/F: 175/152<br>2) M/F: 88/84<br>3) M/F: 56/45<br>4) M/F: 85/66                                               | All: “All musculoskeletal injuries (traumatic or overuse) newly incurred during competition or training regardless of the consequences with respect to the athlete's absence from competition or training.” | Diagnosis                | 75.0    |
| Longo et al. (2009) [32]        | 1) Sprint<br>2) Middle<br>3) Long (elite)                | CS           | 178<br>1) 41<br>2) 32<br>3) 44                                                       | M/F: 110/68 #<br>Age: 55.4 ± 13.0 (M);<br>52 ± 9.4 (F) #<br>BMI: 22.9 (M); 21.9 (F) #                            | Achilles tendinopathy: A score lower than 100 on the Victorian Institute of Sport Assessment-Achilles (VISA-A).                                                                                             | Self-reported            | 62.5    |

|                                    |                                                          |                  |                                                                                      |                                                                                                       |                                                                                                                                                                                                                                                                                                                                                                                   |                                  |                    |
|------------------------------------|----------------------------------------------------------|------------------|--------------------------------------------------------------------------------------|-------------------------------------------------------------------------------------------------------|-----------------------------------------------------------------------------------------------------------------------------------------------------------------------------------------------------------------------------------------------------------------------------------------------------------------------------------------------------------------------------------|----------------------------------|--------------------|
| Yeung et al. (2009) [40]           | Sprint                                                   | PC               | 44/44 (100.0)                                                                        | M/F: 35/9<br>Age: 18.8 (15-24) (M);<br>19.8 (17-22) (F)<br>BMI: 20.9 (M); 18.6 (F)                    | 1) All: "Missed any practice or competition due to injury of any kind."<br>2) Hamstring: "Any injury to the hamstring muscle group that occurred as a result of running/sprinting that caused the subject to stop; and the injury prevented the subject from participating in training activities for more than 24 hour."                                                         | 1) Self-reported<br>2) Diagnosis | 87.5               |
| Alonso et al. (2010) [30]          | 1) Sprint<br>2) Middle<br>3) Long<br>4) Marathon (elite) | PC               | 1) 412/412 (100.0)<br>2) 202/202 (100.0)<br>3) 130/130 (100.0)<br>4) 182/182 (100.0) | 1) M/F: 239/173<br>2) M/F: 111/91<br>3) M/F: 77/53<br>4) M/F: 102/80                                  | All: "Any musculoskeletal complaint and concussion newly incurred due to competition or training during the study period was regarded as an injury."                                                                                                                                                                                                                              | Diagnosis                        | 62.5               |
| Alonso et al. (2012) [31]          | 1) Sprint<br>2) Middle<br>3) Long<br>4) Marathon (elite) | PC               | 1) 324/324 (100.0)<br>2) 154/154 (100.0)<br>3) 105/105 (100.0)<br>4) 124/124 (100.0) | 1) M/F: 171/153<br>2) M/F: 83/71<br>3) M/F: 62/43<br>4) M/F: 68/56                                    | All: "Any musculoskeletal complaint and concussion newly incurred due to competition or training during the study period was regarded as an injury."                                                                                                                                                                                                                              | Diagnosis                        | 75.0               |
| Jacobsson et al. (2013) [41]       | Sprint (elite)                                           | PC               | 108/77 (71.3)                                                                        | M/F: 59/49<br>Age: 23.4 ± 4.6<br>BMI: 21.5                                                            | All: "Any new musculoskeletal pain, soreness or injury that resulted from athletic training or competition and caused changes in normal training/competition to the mode, duration, intensity or frequency from the current or subsequent training and/or competition sessions. Only injuries occurring while participating in athletics, training or competition were included." | Self-reported                    | 75.0               |
| Fredericson et al. (2005) [33]     | 1) Middle<br>2) Long                                     | RC               | 1) 86/86 (100.0)<br>2) 188/188 (100.0)                                               | 1) M/F: 32/54<br>Age: 21.6 ± 2.9 (M);<br>22.2 ± 5.5 (F)<br>2) M/F: 86/102<br>Age: 24.1 (M); 20.9 (F)* | Stress fractures: N/A                                                                                                                                                                                                                                                                                                                                                             | Self-reported                    | 12.5               |
| Bovens et al. (1989) [81]          | Novice                                                   | PC               | 115/73 (63.5)                                                                        | M/F: 58/15<br>Age: 35.2 ± 7.9 (M);<br>33.5 ± 6.4 (F)<br>BMI: 22.7 (M); 21.0 (F)                       | All: "Any physical complaint developed in relation with running activities and causing restriction in running distance, speed, duration or frequency."                                                                                                                                                                                                                            | Self-reported                    | 50.0               |
| Buist et al. (2008, 2010) [82, 83] | Novice                                                   | 1) RCT<br>2) RCT | 603/486 (80.6)                                                                       | M/F: 226/306 #<br>Age: 39.8 ± 10.1 #<br>BMI: 24.9 ± 2.4 #                                             | Lower extremity: "Running-related musculoskeletal pain of the lower extremity or back causing a restriction of running for at least 1 week."                                                                                                                                                                                                                                      | Self-reported                    | 1) 62.5<br>2) 75.0 |

|                                            |              |                            |                 |                                                           |                                                                                                                                                                                                                                                                |               |                               |
|--------------------------------------------|--------------|----------------------------|-----------------|-----------------------------------------------------------|----------------------------------------------------------------------------------------------------------------------------------------------------------------------------------------------------------------------------------------------------------------|---------------|-------------------------------|
| Thijs et al. (2008) [84]                   | Novice       | PC                         | 143/102 (71.3)  | M/F: 22/107 #<br>Age: 37 ± 9.5<br>BMI: 25 ± 3             | Patellofemoral pain: diagnosis by sports medicine physician.                                                                                                                                                                                                   | Diagnosis     | 62.5                          |
| Ghani Zadeh Hesar et al. (2009) [85]       | Novice       | PC                         | 131/131 (100.0) | M/F: 20/111<br>Age: 39.1 ± 10.3<br>BMI: 24.8              | Lower leg overuse: all injuries resulting from participation in the start-to-run program.                                                                                                                                                                      | Diagnosis     | 62.5                          |
| Van Ginckel et al. (2009) [86]             | Novice       | PC                         | 129/129 (100.0) | M/F: 19/110<br>Age: 39 ± 10<br>BMI: 24.8 ± 3.5            | 1) Overuse: "a musculoskeletal ailment that causes a restriction of running speed, distance, duration or frequency for at least 1 week."<br>2) Achilles tendinopathy: N/A                                                                                      | Diagnosis     | 75.0                          |
| Thijs et al. (2011) [87]                   | Novice       | PC                         | 77/77 (100.0)   | M/F: 0/77<br>Age: 38 ± 9<br>BMI: 24.6 ± 2.9               | 1) Lower extremity: "all musculoskeletal injuries of the lower extremities of the study participants who came to seek medical attention."<br>2) Patellofemoral dysfunction syndrome: diagnosis                                                                 | Diagnosis     | 75.0                          |
| Bredeweg et al. (2012, 2013, 2013) [88-90] | Novice       | 1) RCT<br>2) RCT<br>3) RCT | 500/362 (72.4)  | M/F: 149/283 #<br>Age: 38.1 ± 10.8 #<br>BMI: 24.1 ± 3.6 # | Lower extremity: "Any musculoskeletal complaint of the lower extremity or back causing a running restriction for at least 1 week."                                                                                                                             | Self-reported | 1) 62.5<br>2) 75.0<br>3) 50.0 |
| Nielsen et al. (2013, 2013) [25, 91]       | Novice       | PC                         | 933/930 (99.7)  | M/F: 468/461<br>Age: 37.1<br>BMI: 26.3                    | Lower extremity: "A musculoskeletal complaint of the lower extremity or back caused by running, which restricted the amount of running for at least 1 week. Participant attributed injury (partly) to running."                                                | Diagnosis     | 1) 75.0<br>2) 75.0            |
| Nielsen et al. (2013) [92]                 | Novice       | PC                         | 118/58 (49.2)   | M/F: 32/28<br>Age: 39.8 ± 9.3<br>BMI 25.5 ± 3.9           | Lower extremity: "Any musculoskeletal complaint of the lower extremity or back causing a restriction of running for at least 1 week."                                                                                                                          | Self-reported | 75.0                          |
| Buist et al. (2010) [7]                    | Recreational | PC                         | 875/629 (71.9)  | M/F: 207/422<br>Age: 43.7 ± 9.5<br>BMI: 24.9 ± 3.3        | 1) Lower extremity: "Any musculoskeletal pain of the lower limb or back causing a restriction in running (mileage, pace or duration) for at least 1 day."<br>2) Lower extremity: "Running related pain to the lower extremity without restriction of running." | Self-reported | 50.0                          |
| Lopes et al. (2011) [93]                   | Recreational | CS                         | 1049            | M/F: 796/253<br>Age: 39 ± 11<br>BMI: 24.3 ± 2.8           | All: "Current running-related musculoskeletal pain."                                                                                                                                                                                                           | Self-reported | 62.5                          |
| Hespanhol Junior et al. (2012) [94]        | Recreational | RC                         | 200/200 (100.0) | M/F: 120/80<br>Age: 43.0 ± 10.5<br>BMI: 24.2 ± 4.3        | All: "Any running-related musculoskeletal pain that have being severe enough to prevent the runner to perform at least one training session."                                                                                                                  | Self-reported | 62.5                          |

|                                       |              |    |                     |                                                    |                                                                                                                                                                                                                                                                                                                                                                                                                                                             |                |                    |
|---------------------------------------|--------------|----|---------------------|----------------------------------------------------|-------------------------------------------------------------------------------------------------------------------------------------------------------------------------------------------------------------------------------------------------------------------------------------------------------------------------------------------------------------------------------------------------------------------------------------------------------------|----------------|--------------------|
| Hespanhol Junior et al. (2013) [95]   | Recreational | PC | 200/191 (95.5)      | M/F: 141/50<br>Age: 42.8 ± 10.5<br>BMI: 24.4 ± 3.1 | All: "Any pain of musculoskeletal origin attributed to running by the runners themselves and severe enough to prevent the runner from performing at least one training session."                                                                                                                                                                                                                                                                            | Self-reported  | 75.0               |
| Garrick & Requa (1978, 1978) [20, 21] | Cross        | PC | 167/167 (100.0)     | M/F: 141/26                                        | All: "Medical problems arising as a direct result of interscholastic sport participation that required a participant to be withdrawn from a practice or competitive event or miss participation in a subsequent practice or competitive event."                                                                                                                                                                                                             | Coach reported | 1) 62.5<br>2) 75.0 |
| Grana (1979) [22]                     | Cross        | PC | 486/486 (100.0)     | N/A                                                | All: "Any event that altered the participant's ability to participate in a game or practice in the usual manner of other participants."                                                                                                                                                                                                                                                                                                                     | Coach reported | 25.0               |
| Shively et al. (1981) [26]            | Cross        | PC | 576/576 (100.0)     | M/F: 389/187                                       | All: "Any event that altered the ability of a participant to compete or practice in the usual manner."                                                                                                                                                                                                                                                                                                                                                      | Coach reported | 50.0               |
| Chandy & Grana (1985) [5]             | Cross        | PC | 2,278/2,278 (100.0) | M/F: 1,567/711                                     | All: "Any problem that resulted in an altered or lost practice session or game."                                                                                                                                                                                                                                                                                                                                                                            | Coach reported | 75.0               |
| McLain & Reynolds (1989) [24]         | Cross        | PC | 94/94 (100.0)       | M/F: 54/40                                         | All: "Any incident resulting from athletic participation that keeps an athlete from completing a practice or game, or causes the athlete to miss a subsequent practice or game."                                                                                                                                                                                                                                                                            | Coach reported | 75.0               |
| Beachy et al. (1997) [16]             | Cross        | PC | 1,288/1,288 (100.0) | M/F: 501/787                                       | 1) All: "Any athlete complaint that required the attention of the athletic trainer, regardless of the time lost from activity."<br>2) All: "All injuries reported to the athletic training staff that resulted in at least 1 day of lost activity."                                                                                                                                                                                                         | Coach reported | 75.0               |
| Eickhoff et al. (2000) [19]           | Cross        | RC | 164/164 (100.0)     | M/F: 91/73                                         | Lower leg: "A lower leg injury as a result of running."<br><br>Medial tibial stress syndrome: "Pain is most commonly found on the medial border of the tibia or the inside of the lower leg bone closest to the middle of the body. The pain during activity will increase but may decrease when not weight-bearing. There may be some swelling associated with the lower leg pain in the medial muscle area next to the middle leg bone of the lower leg." | Self-reported  | 37.5               |
| Rauh et al. (2000) [42]               | Cross        | PC | 3,233/3,233 (100.0) | M/F: 2,031/1,202                                   | All: "A medical problem resulting from athletic participation that required an athlete to be removed from a practice or competitive event or to miss a subsequent practice or competitive event."                                                                                                                                                                                                                                                           | Coach reported | 87.5               |

|                                   |       |                |                                         |                                                  |                                                                                                                                                                                                                                               |                                       |                    |
|-----------------------------------|-------|----------------|-----------------------------------------|--------------------------------------------------|-----------------------------------------------------------------------------------------------------------------------------------------------------------------------------------------------------------------------------------------------|---------------------------------------|--------------------|
| Bennett et al. (2001) [43]        | Cross | PC             | 125/125 (100.0)                         | M/F: 57/68<br>Age: 16.0 ± 1.1                    | Medial tibial stress syndrome: "Athletes had symptoms of medial tibial stress syndrome and had pain in the symptomatic limb with palpation along the medial border."                                                                          | Coach reported, Diagnosis             | 75.0               |
| Rauh et al. (2006, 2007) [44, 45] | Cross | PC             | 1) 421/421 (100.0)<br>2) 421/393 (93.3) | M/F: 235/186<br>BMI: 20.4 ± 2.0                  | Lower extremity: "Any reported muscle, joint, or bone problem/injury of the back or lower extremity resulting from running in a practice or meet and requiring the runner to be removed from a practice or meet or to miss a subsequent one." | Coach reported                        | 1) 87.5<br>2) 62.5 |
| Reinking (2006) [6]               | Cross | 1) PC<br>2) RC | 18/18 (100.0)                           | M/F: 0/18<br>Age: 19.5 ± 1.2<br>BMI: 21.1 ± 1.8  | Lower extremity: "Athletes who rated their Exercise Related Leg Pain as Nirschl 2 or greater."<br>1) Without interference in sports participation<br>2) Interfering with sports participation                                                 | Self-reported, Diagnosis              | 62.5               |
| Reinking & Hayes (2006) [46]      | Cross | 1) RC<br>2) PC | 1) 63/63 (100.0)<br>2) 32/32 (100.0)    | M/F: 30/33<br>Age: 19.4 ± 1.2                    | Lower leg: "Pain between their knee and ankle associated with exercise that had interfered with their cross country training or competition."                                                                                                 | 1) Self-reported<br>2) Coach reported | 50.0               |
| Kelsey et al. (2007) [47]         | Cross | PC             | 127/127 (100.0)                         | M/F: 0/127<br>Age: 22.0 ± 2.6<br>BMI: 21.2 ± 1.9 | Stress fractures: N/A                                                                                                                                                                                                                         | Self-reported, Diagnosis              | 50.0               |
| Laker et al. (2007) [48]          | Cross | CS             | 25                                      | M/F: 15/10                                       | Stress fractures: N/A                                                                                                                                                                                                                         | Diagnosis                             | 25.0               |
| Plisky et al. (2007) [49]         | Cross | PC             | 130/130 (100.0)                         | M/F: 59/46<br>Age: 15.0 ± 1.0<br>BMI: 20.5       | Medial Tibial Stress Syndrome: "Continuous or intermittent pain in the tibial region, exacerbated with repetitive weight-bearing activity, and localized pain with palpation along the distal two thirds of the posterior-medial tibia."      | Coach reported                        | 100.0              |
| Reinking et al. (2007) [50]       | Cross | 1) RC<br>2) PC | 1) 88/88 (100.0)<br>2) 88/67 (76.1)     | M/F: 44/44<br>Age: 19.5 (18-24)                  | Lower extremity: N/A                                                                                                                                                                                                                          | Self-reported                         | 25.0               |
| Reinking et al. (2010) [51]       | Cross | 1) RC<br>2) PC | 125/93 (74.4)                           | M/F: 63/62<br>Age: 15.4 (13-18)                  | Lower extremity: Whether exercise related lower leg pain had caused the athlete to miss at least 1 day of training, or whether exercise related lower leg pain had negatively affected the athlete's race time."                              | Self-reported                         | 50.0               |
| Finnoff et al. (2011) [52]        | Cross | PC             | 57/57 (100.0)                           | M/F: 53/44 #<br>Age: 16.0 (14-18)*               | Knee pain: Noble compression test, patellar grind test                                                                                                                                                                                        | Diagnosis                             | 62.5               |
| Bennett et al. (2012) [53]        | Cross | 1) RC<br>2) PC | 77/59 (76.6)                            | M/F: 44/33                                       | Lower extremity: "Pain located in the anterior, medial, posterior, or lateral leg not associated with a traumatic injury."                                                                                                                    | Self-reported                         | 12.5               |
| Koplan et al. (1982) [23]         | Road  | RC             | 2,500/1,423                             | M/F: 693/730<br>Age: 33.4 (M); 29.9 (F)          | All: "A musculoskeletal ailment attributed to running that caused the runner to reduce the weekly mileage, take medicine, or visit a health professional."                                                                                    | Self-reported                         | 37.5               |

|                                    |                        |                |                                                  |                                                                                                                                                  |                                                                                                                                                                                                                                                              |               |                    |
|------------------------------------|------------------------|----------------|--------------------------------------------------|--------------------------------------------------------------------------------------------------------------------------------------------------|--------------------------------------------------------------------------------------------------------------------------------------------------------------------------------------------------------------------------------------------------------------|---------------|--------------------|
| Nicholl & Williams (1982) [34]     | 1) Road<br>2) Marathon | RC             | 614/554 (90.2)<br>1) 242<br>2) 312               | 1) M/F: 178/64<br>Age: 180 < 40 years<br>62 ≥ 40 years<br>2) M/F: 283/29<br>Age: 239 < 40 years<br>73 ≥ 40 years                                 | All: N/A                                                                                                                                                                                                                                                     | Self-reported | 25.0               |
| Nicholl & Williams (1983) [35]     | 1) Road<br>2) Marathon | PC             | 1) 1,140/1,140 (100.0)<br>2) 2,289/2,289 (100.0) | M/F: 3,264/198 #<br>Age:<br>304 between 18-29<br>150 between 30-39<br>63 ≥ 40                                                                    | All: visit to the first-aid post during the competition.                                                                                                                                                                                                     | Diagnosis     | 62.5               |
| Hughes et al. (1985) [54]          | Road                   | RC             | 1,266/1,266 (100.0)                              | M/F: 1,078/188<br>Age 32.3 (9-75)                                                                                                                | All: "Orthopedic problems or any specific running injuries severe enough to interfere with their training schedules."                                                                                                                                        | Self-reported | 62.5               |
| Jacobs & Berson (1986) [55]        | Road                   | RC             | 487/451 (92.6)                                   | M/F: 355/96<br>Age: 33.9 (14-64) (M);<br>32.4 (8-57)                                                                                             | Lower extremity: "Any lower extremity or lower back pain that caused a restriction in running, distance or speed, or prevented any running at all."                                                                                                          | Self-reported | 37.5               |
| Lloyd et al. (1986) [56]           | Road                   | RC             | 267/260 (97.4)                                   | M/F: 0/260<br>Age: 32.2 ± 0.7<br>BMI: 20.9                                                                                                       | All: "Any musculoskeletal ailment attributed to running that caused the runner to interrupt her running program and/or to seek medical help."                                                                                                                | Self-reported | 25.0               |
| Marti et al. (1988, 1988) [57, 58] | Road                   | RC             | 5,534/4,786 (86.5)                               | M/F: 4,358/428<br>Age: 34.9 (M), 32.6 (F)<br>BMI: 22.4 ± 1.9 (M);<br>20.3 ± 1.6 (F)                                                              | 1) All: injuries involved maintenance of full training activity in spite of symptoms (grade 1)<br>2) All: injuries involved a reduction of training activity (grade 2)<br>3) All: injuries involved full training interruption of at least 2 weeks (grade 3) | Self-reported | 1) 62.5<br>2) 75.0 |
| Koplan et al. (1995) [3]           | Road                   | RC             | 742/535 (72.1)                                   | M/F: 326/209<br>Age:<br>59 ≤ 29 years<br>113 between 30-39<br>227 between 40-49<br>103 between 50-59<br>32 ≥ 60 years<br>BMI: 24.6 (M); 21.5 (F) | All: "A musculoskeletal ailment that caused respondents to reduce or cease exercise or interfered with their work or school activities."                                                                                                                     | Self-reported | 50.0               |
| Yeung et al. (1998) [36]           | 1) Road<br>2) Marathon | PC             | 1) 4,600/4,600 (100.0)<br>2) 900/900 (100.0)     | N/A                                                                                                                                              | All: "All runners who required physiotherapy services"                                                                                                                                                                                                       | Diagnosis     | 62.5               |
| Woolf et al. (2002) [59]           | Road                   | 1) RC<br>2) CS | 436/436 (100.0)                                  | M/F: 52% / 48%<br>Age: 39.4 (12-73) (M);<br>33.5 (11-65) (F) #                                                                                   | Low back pain: N/A                                                                                                                                                                                                                                           | Self-reported | 25.0               |

|                                 |                        |                |                                          |                                                                                                         |                                                                                                                                                                                                                                         |                             |      |
|---------------------------------|------------------------|----------------|------------------------------------------|---------------------------------------------------------------------------------------------------------|-----------------------------------------------------------------------------------------------------------------------------------------------------------------------------------------------------------------------------------------|-----------------------------|------|
| Micklesfield et al. (2007) [37] | 1) Road<br>2) Ultra    | RC             | 1) 337/337 (100.0)<br>2) 276/276 (100.0) | 1) M/F: 0/337<br>Age: 34 ± 10.5<br>BMI: 21.9 ± 2.9<br>2) M/F: 0/276<br>Age: 39 ± 8.2<br>BMI: 21.6 ± 2.4 | Stress fractures: N/A                                                                                                                                                                                                                   | Self-reported               | 12.5 |
| Chang et al. (2012) [38]        | 1) Road<br>2) Marathon | RC             | 1,004/893 (88.9)<br>1) 765<br>2) 128     | 1) M/F: 668/97<br>Age: 33.6 ± 9.8 #<br>BMI: 22.9 #<br>2) M/F: 122/6<br>Age: 38.8 ± 11.6<br>BMI: 22.4    | Lower extremity: N/A                                                                                                                                                                                                                    | Self-reported               | 12.5 |
| Pasquina et al. (2013) [60]     | Road                   | PC             | 91,750/91,750<br>(100.0)                 | M/F: 48% / 52%<br>Age: 64% within 25-44                                                                 | All: participants treated by medical personnel                                                                                                                                                                                          | Diagnosis                   | 62.5 |
| Caldwell (1981) [61]            | Marathon               | RC             | 302/84 (27.8)                            | M/F: 269/42<br>Age: 12-62                                                                               | All: "Any physical problem that the runner felt negatively affected his/her performance."                                                                                                                                               | Self-reported               | 25.0 |
| Maughan & Miller (1983) [62]    | Marathon               | RC             | 497/449 (90.3)                           | M/F: 472/25<br>Age: 32 ± 8                                                                              | 1) All: injuries occurred during preparation for the race.<br>2) All: injuries occurred during the race.                                                                                                                                | Self-reported               | 0.0  |
| Kretsch et al. (1984) [63]      | Marathon               | 1) RC<br>2) CS | 1,098/459                                | M/F: 348/111                                                                                            | All: "Injuries occurring immediately before the race; medical problems experienced during the race; pains or 'unusual' symptoms developing after the race."                                                                             | Self-reported,<br>Diagnosis | 25.0 |
| McKelvie et al. (1985) [64]     | Marathon               | RC             | 127/126 (99.2)                           | M/F: 105/21<br>Age: 34.9 ± 9.1 (M)<br>BMI: 22.4 (M)                                                     | All: interruptions of training due to injury.                                                                                                                                                                                           | Self-reported               | 25.0 |
| Hölmich et al. (1988) [65]      | Marathon               | RC             | 60/60 (100.0)                            | M/F: 60/0<br>Age: 28 (18-51)                                                                            | All: Injury preventing them from training.                                                                                                                                                                                              | Self-reported               | 62.5 |
| Hölmich et al. (1989) [66]      | Marathon               | RC             | 1,426/1,310 (91.9)                       | M/F: 1,310/0<br>Age: 34 (11-77)<br>BMI: 22.9                                                            | All: Injury preventing them from training or work.                                                                                                                                                                                      | Self-reported               | 12.5 |
| Macera et al. (1991) [67]       | 1)<br>Marathon         | RC             | 964/509 (52.8) #<br>1) 162               | M/F: 146/16<br>Age: 36 (M); 33 (F)                                                                      | Lower extremity: "Problems in any of the following sites (foot, ankle, Achilles tendon, calf or shin, knee, thigh, and hip), regardless of cause, that required a consultation with a physician or reduction in usual running mileage." | Self-reported               | 50.0 |
| Jakobsen et al. (1994) [68]     | Marathon               | RCT            | 41/41 (100.0)                            | M/F: 37/4<br>Age: 41.8 *<br>BMI: 22.7 *                                                                 | All: "Any injury of the musculoskeletal system that was sustained during running and prevented training or competition."                                                                                                                | Self-reported               | 62.5 |

|                                             |          |                |                                        |                                                     |                                                                                                                                                                                                                                                                                                  |                                  |                    |
|---------------------------------------------|----------|----------------|----------------------------------------|-----------------------------------------------------|--------------------------------------------------------------------------------------------------------------------------------------------------------------------------------------------------------------------------------------------------------------------------------------------------|----------------------------------|--------------------|
| Satterthwaite et al. (1996, 1999) [69, 96]  | Marathon | PC             | 1,054/916 (86.9)                       | M/F: 80.3% / 19.7%<br>Age: 38.6 ± 9.8               | 1) All: Specific health problems, using a matrix of 13 body sites by 11 problem types.<br>2) All: Injuries and other health problems sustained by runners attending a medical aid post.                                                                                                          | 1) Self-reported<br>2) Diagnosis | 1) 75.0<br>2) 62.5 |
| Roberts (2000) [70]                         | Marathon | PC             | 76,714/76,714 (100.0)                  | M/F: 59,751/16,963 #                                | All: "Any disability that interferes with function where medical assistance is either requested or rendered at the finish line medical tent."                                                                                                                                                    | Diagnosis                        | 75.0               |
| Van Middelkoop et al. (2008, 2008) [71, 72] | Marathon | 1) RC<br>2) PC | 1) 726/725 (99.9)<br>2) 724/694 (95.9) | M/F: 725/0<br>Age: 43.7 ± 9.6<br>BMI: 23.6 ± 2.1    | Lower extremity: "An injury to muscles, joints, tendons, and/or bones of the lower extremities that the participant attributed to running. The problem had to be severe enough to cause a reduction in distance, speed, duration, or frequency of running."                                      | Self-reported                    | 1) 75.0<br>2) 62.5 |
| Parker et al. (2011) [73]                   | Marathon | RC             | 545/374 (68.6)                         | M/F: 0/378                                          | All: Injuries leading to: No change in running pace or routine or slowed pace while running, same weekly routine or slowed pace while running and decreased weekly mileage or stopped running for less than 1 week or stopped running for 1 to 4 weeks or stopped running for more than 1 month. | Self-reported                    | 37.5               |
| Rasmussen et al. (2013) [74]                | Marathon | RC             | 680/662 (97.4)                         | M/F: 535/127<br>Age: 41.4 ± 10.4<br>BMI: 23.0 ± 2.3 | All: "An injury to muscles, tendons, joints and/or bones caused by running. The injury had to be severe enough to cause or be expected to cause a reduction in distance, speed, duration, or frequency of running for at least 14 days."                                                         | Self-reported                    | 62.5               |
| Ogwumike & Adeniyi (2013) [97]              | Marathon | PC             | 920/920 (100.0)                        | M/F: 856/64<br>Age: 24.8 *                          | All: runners who contacted the paramedical services.                                                                                                                                                                                                                                             | Diagnosis                        | 62.5               |
| Hutson (1984) [75]                          | Ultra    | PC             | 25/25 (100.0)                          | M/F: 23/2<br>Age: 41 (23-57)                        | All: An injury sufficiently severe to impair their performance.                                                                                                                                                                                                                                  | Diagnosis                        | 62.5               |
| Fallon (1996) [76]                          | Ultra    | PC             | 32/32 (100.0)                          | Age: 38 (23-53) (M);<br>43 (40-46) (F)              | All: "An injury was recorded only following examination of the runner after a request from the runner or crew, or following a decision by the medical staff member."                                                                                                                             | Diagnosis                        | 50.0               |
| Bishop & Fallon (1999) [77]                 | Ultra    | PC             | 17/17 (100.0)                          | M/F: 16/1<br>Age: 47 ± 11                           | All: "A specific musculoskeletal abnormality that the runner perceived to be affecting his or her performance. Conditions ubiquitous in ultra-marathon, such as muscle soreness, cramps, and blisters were not included."                                                                        | Diagnosis                        | 75.0               |
| Krabak et al. (2011) [78]                   | Ultra    | PC             | 396/396 (100.0)                        | M/F: 79.2% / 20.8%<br>BMI: 23.9 ± 3.5               | All: "A disability sustained by a study participant during the race, resulting in a medical encounter by the medical staff."                                                                                                                                                                     | Diagnosis                        | 100.0              |



|                                |       |    |                     |                                                  |                                                                                                                                    |               |      |
|--------------------------------|-------|----|---------------------|--------------------------------------------------|------------------------------------------------------------------------------------------------------------------------------------|---------------|------|
| Scheer & Murray (2011) [79]    | Ultra | PC | 69/69 (100.0)       | M/F: 48/21<br>Age: 46 (27-63) (M);<br>40 (26-50) | All: "All clinical encounters from the start of the first stage until the clinic immediately after the last stage."                | Diagnosis     | 62.5 |
| Hoffman & Krishnan (2014) [80] | Ultra | RC | 1,212/1,212 (100.0) | M/F: 68% / 32%<br>Age: 42.3 (18-81)              | 1) All: exercise-related injuries without training loss.<br>2) All: exercise-related injuries with at least one day training loss. | Self-reported | 25.0 |

PC: Prospective Cohort, RC: Retrospective Cohort, RCT: Randomized Controlled Trial, CS: Cross-Sectional, ROB: Risk of Bias, M: Male, F: Female, N/A: Not Available

#: Descriptives for total population or subgroup, instead of study sample.

\*: Mean is calculated based on different groups.
