# Supplementary material for: What are the Differences in Injury Proportions Between Different Populations of Runners? A Systematic Review and Meta-Analysis
Source: PubMed Central journal article supplement (PMC4513221; doi:10.1007/s40279-015-0331-x), 2015-04-08
Supplement: 40279_2015_331_MOESM4_ESM.pdf [file 40279_2015_331_MOESM4_ESM.pdf]

**Electronic Supplementary Material Appendix S4.** Risk of Bias scores of the included articles.

| Study                                 | Criteria for Risk of Bias assessment<br>(Electronic Supplementary Material Appendix S2) |   |   |   |   |   |   |   | Score  |
|---------------------------------------|-----------------------------------------------------------------------------------------|---|---|---|---|---|---|---|--------|
|                                       | 1                                                                                       | 2 | 3 | 4 | 5 | 6 | 7 | 8 |        |
| <b>Track: sprinters</b>               |                                                                                         |   |   |   |   |   |   |   |        |
| Lysholm and Wiklander [27]            | +                                                                                       | - | - | + | + | + | + | + | 75.0%  |
| D'Souza [18]                          | +                                                                                       | - | + | - | + | - | - | - | 37.5%  |
| Bennell et al. [28]                   | +                                                                                       | + | - | + | + | + | + | + | 87.5%  |
| Bennell et al. [17]                   | +                                                                                       | + | - | + | - | + | + | - | 62.5%  |
| Sugiura et al. [39]                   | -                                                                                       | + | - | + | + | + | + | + | 75.0%  |
| Alonso et al. [29]                    | +                                                                                       | - | + | + | + | + | - | + | 75.0%  |
| Longo et al. [32]                     | -                                                                                       | + | - | + | - | + | + | + | 62.5%  |
| Yeung et al. [40]                     | +                                                                                       | + | - | + | + | + | + | + | 87.5%  |
| Alonso et al. [30]                    | +                                                                                       | - | - | + | + | + | - | + | 62.5%  |
| Alonso et al. [31]                    | +                                                                                       | - | + | + | + | + | - | + | 75.0%  |
| Jacobsson et al. [41]                 | +                                                                                       | + | - | - | + | + | + | + | 75.0%  |
| <b>Track: middle-distance runners</b> |                                                                                         |   |   |   |   |   |   |   |        |
| Fredericson et al. [33]               | -                                                                                       | - | - | + | - | - | - | - | 12.5%  |
| <b>Novice runners</b>                 |                                                                                         |   |   |   |   |   |   |   |        |
| Bovens et al. [81]                    | -                                                                                       | + | - | - | + | - | + | + | 50.0%  |
| Buist et al. [82]                     | +                                                                                       | + | - | + | + | - | + | - | 62.5%  |
| Thijs et al. [84]                     | -                                                                                       | + | - | - | + | + | + | + | 62.5%  |
| Ghani Zadeh Hesar et al. [85]         | -                                                                                       | + | - | + | + | + | - | + | 62.5%  |
| van Ginckel et al. [86]               | -                                                                                       | + | - | + | + | + | + | + | 75.0%  |
| Buist et al. [83]                     | -                                                                                       | + | - | + | + | + | + | + | 75.0%  |
| Thijs et al. [87]                     | -                                                                                       | + | - | + | + | + | + | + | 75.0%  |
| Bredeweg et al. [88]                  | +                                                                                       | + | - | + | + | - | + | - | 62.5%  |
| Bredeweg et al. [89]                  | -                                                                                       | + | - | + | + | + | + | + | 75.0%  |
| Bredeweg et al. [90]                  | -                                                                                       | + | - | + | + | - | + | - | 50.0%  |
| Nielsen et al. [25]                   | -                                                                                       | + | - | + | + | + | + | + | 75.0%  |
| Nielsen et al. [91]                   | -                                                                                       | + | - | + | + | + | + | + | 75.0%  |
| Nielsen et al. [92]                   | -                                                                                       | + | - | + | + | + | + | + | 75.0%  |
| <b>Recreational runners</b>           |                                                                                         |   |   |   |   |   |   |   |        |
| Buist et al. [7]                      | +                                                                                       | + | - | - | + | - | + | - | 50.0%  |
| Lopes et al. [93]                     | +                                                                                       | + | - | - | - | + | + | + | 62.5%  |
| Hespanhol Junior et al. [94]          | +                                                                                       | + | - | - | + | + | + | - | 62.5%  |
| Hespanhol Junior et al. [95]          | +                                                                                       | + | - | - | + | + | + | + | 75.0%  |
| <b>Cross-country runners</b>          |                                                                                         |   |   |   |   |   |   |   |        |
| Garrick and Requa [21]                | -                                                                                       | - | - | + | + | + | + | + | 62.5%  |
| Garrick and Requa [20]                | +                                                                                       | - | - | + | + | + | + | + | 75.0%  |
| Grana [22]                            | -                                                                                       | - | - | - | + | - | + | - | 25.0%  |
| Shiveley et al. [26]                  | -                                                                                       | - | - | + | + | + | + | - | 50.0%  |
| Chandy and Grana [5]                  | +                                                                                       | - | + | + | + | - | + | + | 75.0%  |
| McLain and Reynolds [24]              | -                                                                                       | - | + | + | + | + | + | + | 75.0%  |
| Beachy et al. [16]                    | +                                                                                       | - | - | + | + | + | + | + | 75.0%  |
| Eickhoff et al. [19]                  | +                                                                                       | - | - | - | - | + | + | - | 37.5%  |
| Rauh et al. [42]                      | +                                                                                       | - | + | + | + | + | + | + | 87.5%  |
| Bennett et al. [43]                   | +                                                                                       | - | + | + | - | + | + | + | 75.0%  |
| Rauh et al. [44]                      | +                                                                                       | - | + | + | + | + | + | + | 87.5%  |
| Reinking [6]                          | -                                                                                       | + | + | + | - | + | + | - | 62.5%  |
| Reinking and Hayes [46]               | +                                                                                       | - | - | + | - | + | + | - | 50.0%  |
| Kelsey et al. [47]                    | -                                                                                       | + | - | + | - | + | - | + | 50.0%  |
| Laker et al. [48]                     | -                                                                                       | - | - | - | - | + | - | + | 25.0%  |
| Plisky et al. [49]                    | +                                                                                       | + | + | + | + | + | + | + | 100.0% |
| Rauh et al. [45]                      | -                                                                                       | - | + | + | - | + | + | + | 62.5%  |
| Reinking et al. [50]                  | +                                                                                       | - | - | - | - | + | - | - | 25.0%  |
| Reinking et al. [51]                  | +                                                                                       | - | - | - | + | + | + | - | 50.0%  |
| Finnoff et al. [52]                   | -                                                                                       | + | - | + | - | + | + | + | 62.5%  |
| Bennett et al. [53]                   | -                                                                                       | - | - | - | - | - | + | - | 12.5%  |
| <b>Road: long-distance runners</b>    |                                                                                         |   |   |   |   |   |   |   |        |

|                               |   |   |   |   |   |   |   |   |        |
|-------------------------------|---|---|---|---|---|---|---|---|--------|
| Koplan et al. [23]            | + | - | - | - | + | - | + | - | 37.5%  |
| Nicholl and Williams [34]     | - | - | - | - | + | - | - | + | 25.0%  |
| Nicholl and Williams [35]     | + | - | + | - | + | + | - | + | 62.5%  |
| Hughes et al. [54]            | + | - | - | - | + | + | + | + | 62.5%  |
| Jacobs and Berson [55]        | - | - | - | - | + | + | + | - | 37.5%  |
| Lloyd et al. [56]             | - | + | - | - | - | - | + | - | 25.0%  |
| Marti [58]                    | - | - | + | + | + | + | + | - | 62.5%  |
| Marti et al. [57]             | + | - | + | + | + | + | + | - | 75.0%  |
| Koplan et al. [3]             | + | + | - | - | + | - | + | - | 50.0%  |
| Yeung et al. [36]             | + | - | + | - | + | + | - | + | 62.5%  |
| Woolf et al. [59]             | + | + | - | - | - | - | - | - | 25.0%  |
| Micklesfield et al. [37]      | - | + | - | - | - | - | - | - | 12.5%  |
| Chang et al. [38]             | - | + | - | - | - | - | - | - | 12.5%  |
| Pasquina et al. [60]          | + | - | + | - | + | + | - | + | 62.5%  |
| <b>Marathon runners</b>       |   |   |   |   |   |   |   |   |        |
| Caldwell [61]                 | - | - | - | - | - | - | + | + | 25.0%  |
| Maughan and Miller [62]       | - | - | - | - | - | - | - | - | 0.0%   |
| Kretsch et al. [63]           | - | - | - | - | + | - | - | + | 25.0%  |
| McKelvie et al. [64]          | - | + | - | - | + | - | - | - | 25.0%  |
| Hölmich et al. [65]           | + | - | + | + | + | - | - | + | 62.5%  |
| Hölmich et al. [66]           | - | + | - | - | - | - | - | - | 12.5%  |
| Macera et al. [67]            | - | - | - | - | + | + | + | + | 50.0%  |
| Jakobsen et al. [68]          | + | - | - | + | + | - | + | + | 62.5%  |
| Satterthwaite et al. [69]     | + | - | + | + | + | + | - | + | 75.0%  |
| Satterthwaite et al. [96]     | - | - | + | + | + | + | - | + | 62.5%  |
| Roberts et al. [70]           | + | - | + | - | + | + | + | + | 75.0%  |
| van Middelkoop et al. [71]    | + | + | - | + | + | - | + | + | 75.0%  |
| van Middelkoop et al. [72]    | - | + | - | + | + | - | + | + | 62.5%  |
| Parker et al. [73]            | - | + | - | - | + | - | - | + | 37.5%  |
| Rasmussen et al. [74]         | - | + | - | - | + | + | + | + | 62.5%  |
| Ogwumike and Adeniyi [97]     | + | - | + | - | + | + | - | + | 62.5%  |
| <b>Ultra-marathon runners</b> |   |   |   |   |   |   |   |   |        |
| Hutson [75]                   | - | - | + | + | + | + | - | + | 62.5%  |
| Fallon [76]                   | - | - | + | + | - | + | - | + | 50.0%  |
| Bishop and Fallon [77]        | - | - | + | + | + | + | + | + | 75.0%  |
| Krabak et al. [78]            | + | + | + | + | + | + | + | + | 100.0% |
| Scheer and Murray [79]        | - | - | + | + | + | + | - | + | 62.5%  |
| Hoffman and Krishnan [80]     | - | - | - | - | + | - | + | - | 25.0%  |
