# Supplementary material for: What are the Differences in Injury Proportions Between Different Populations of Runners? A Systematic Review and Meta-Analysis
Source: PubMed Central journal article supplement (PMC4513221; doi:10.1007/s40279-015-0331-x), 2015-04-08

**Electronic Supplementary Material Appendix S5.** Sensitivity analysis on the low risk of bias studies (ROB score  $\geq 50$ )

**Medical attention injuries during an event**

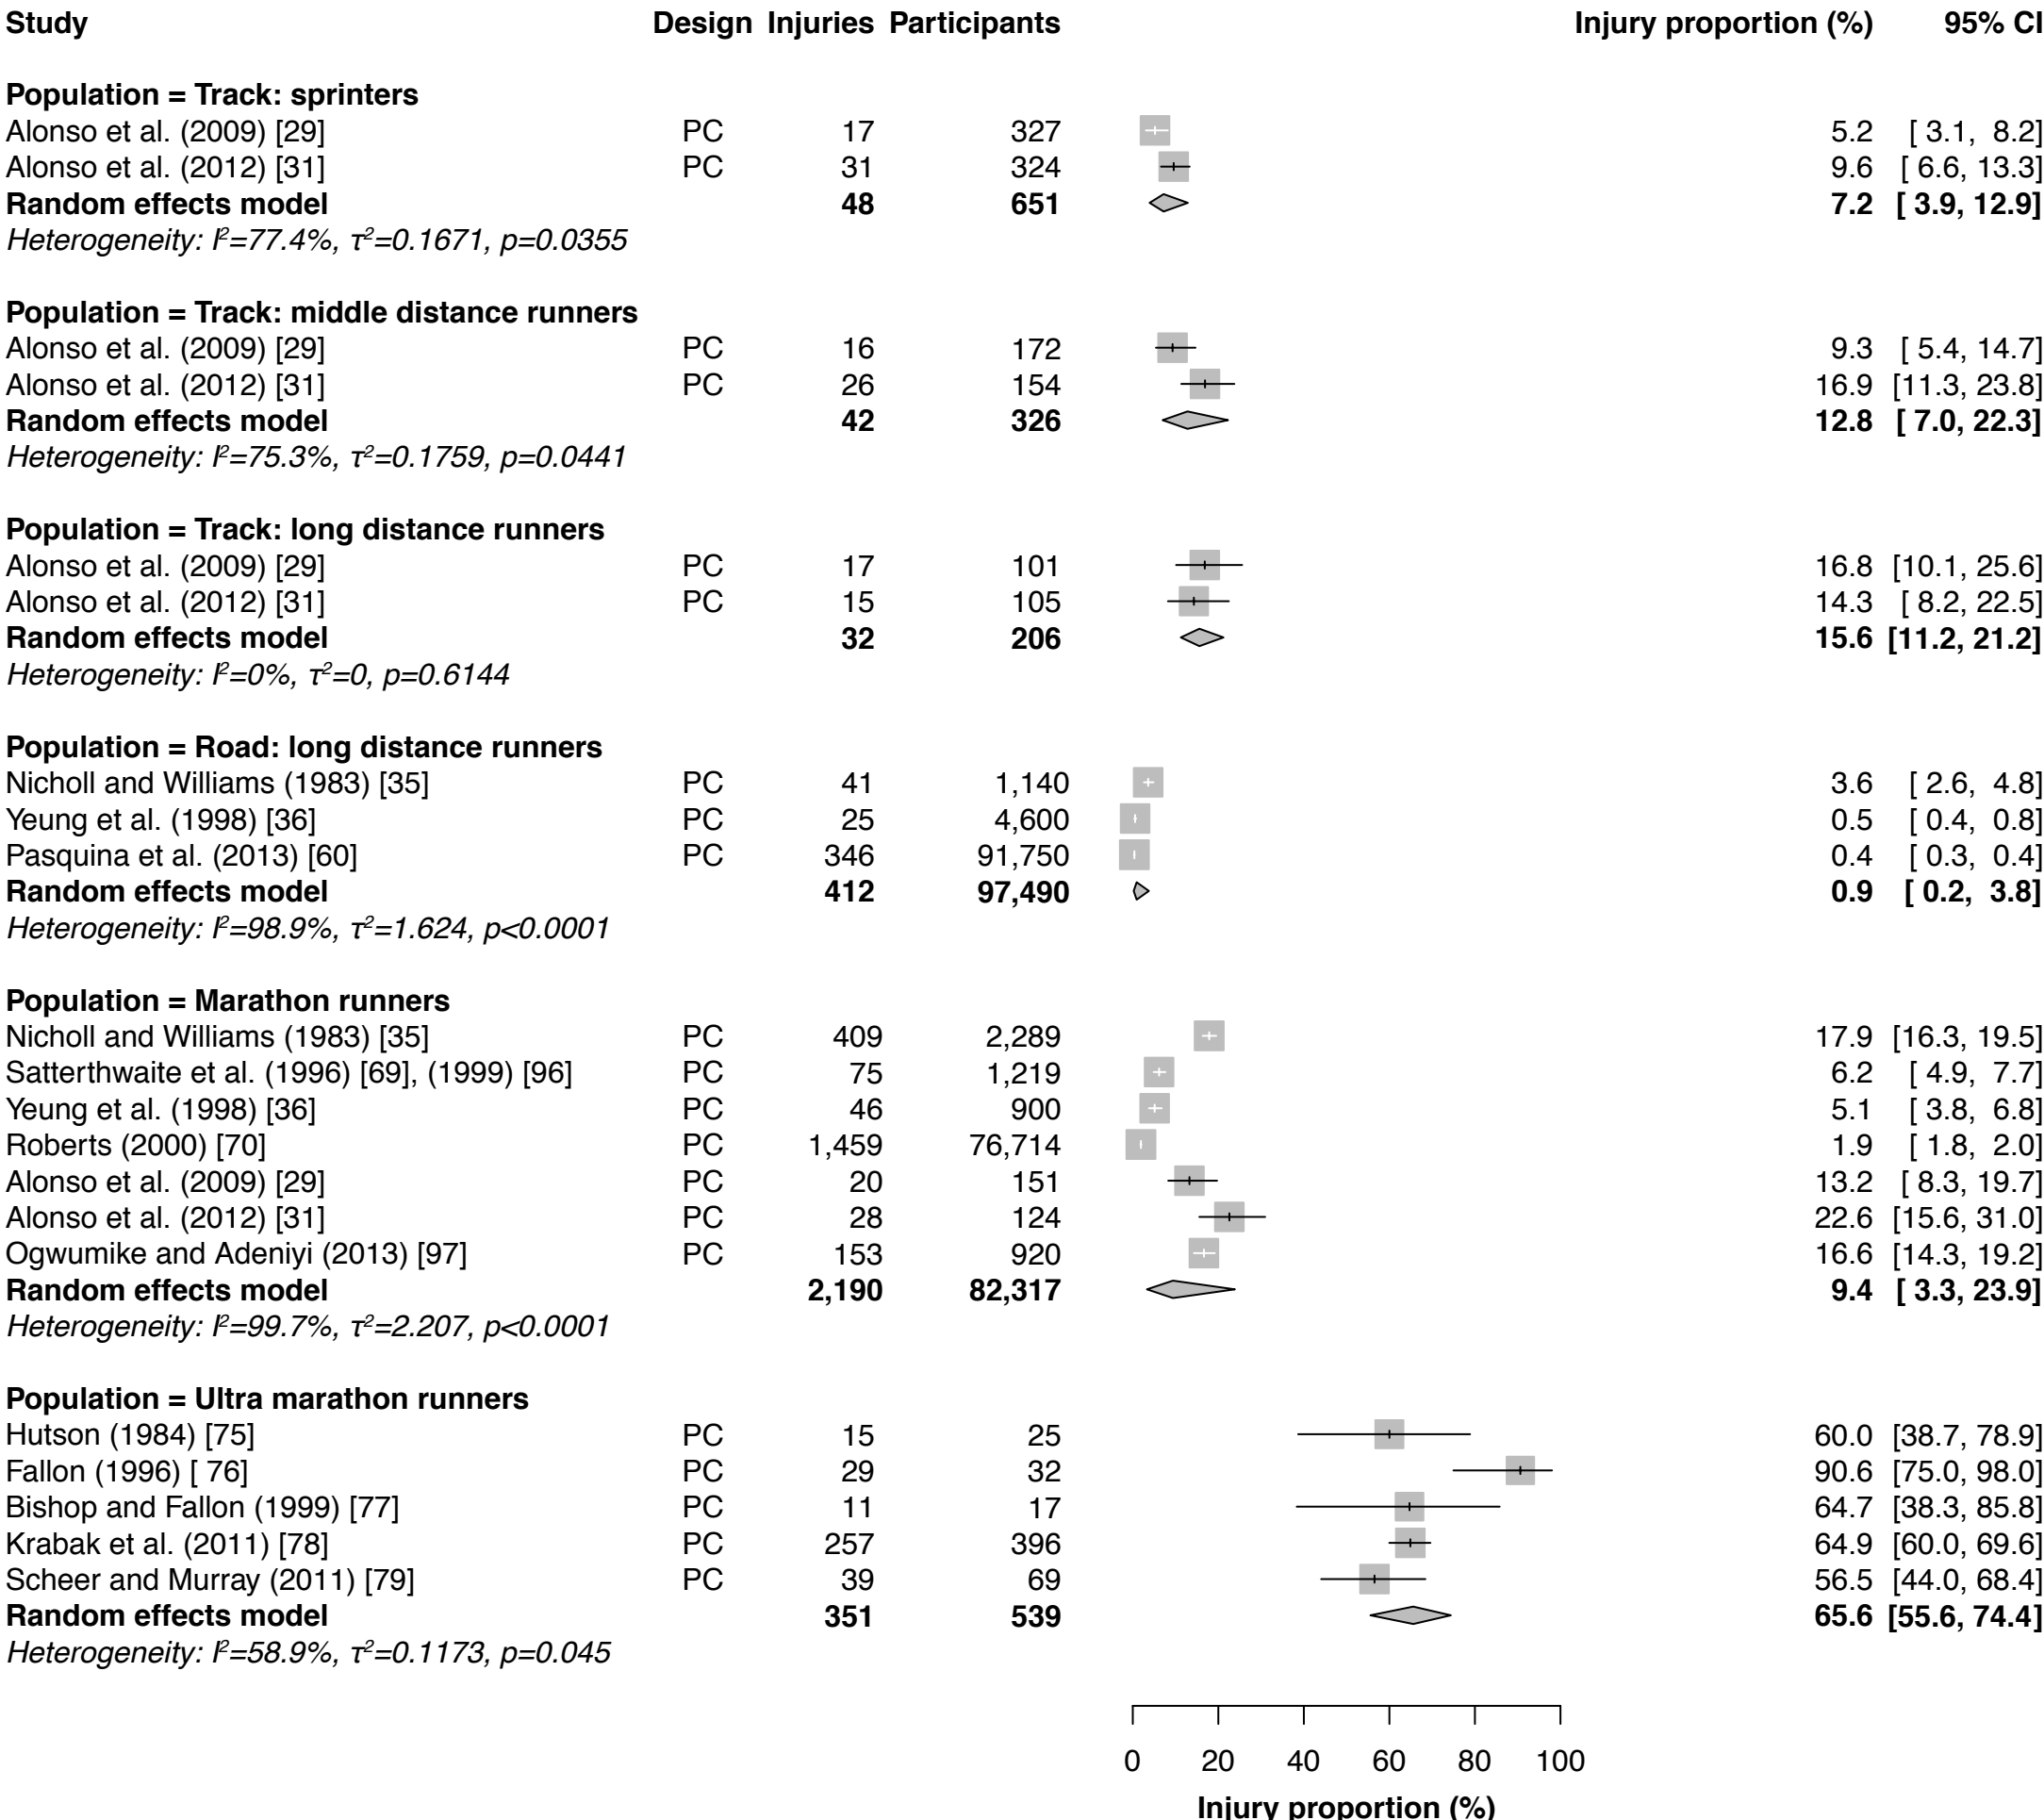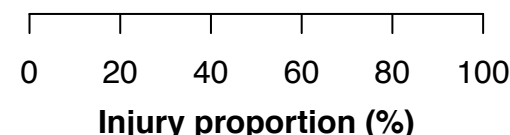

# Time-loss injuries during a short follow-up/recall period

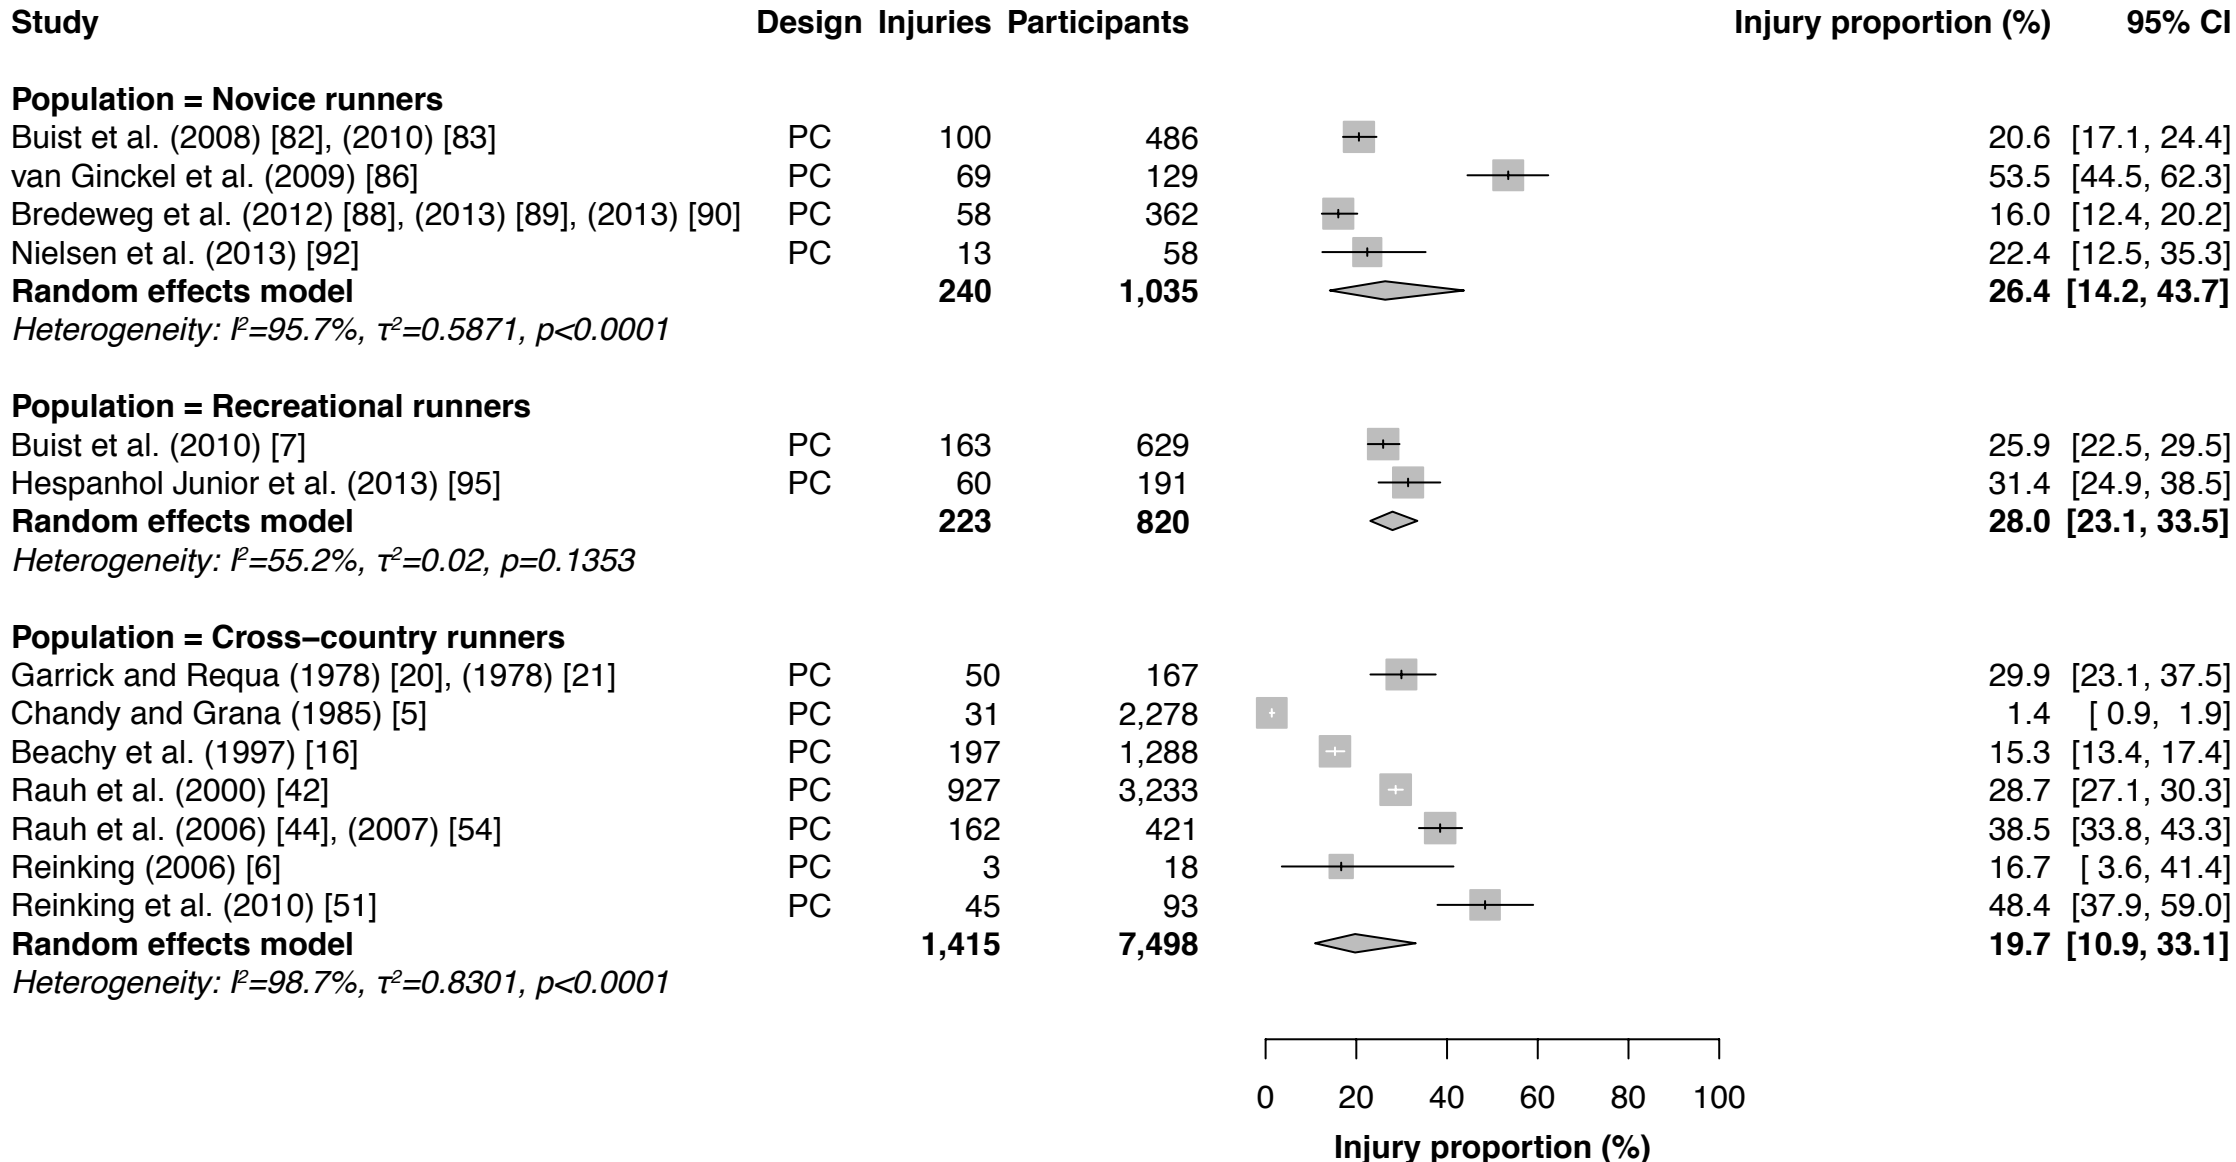

## Pain-related injuries during a short follow-up/recall period

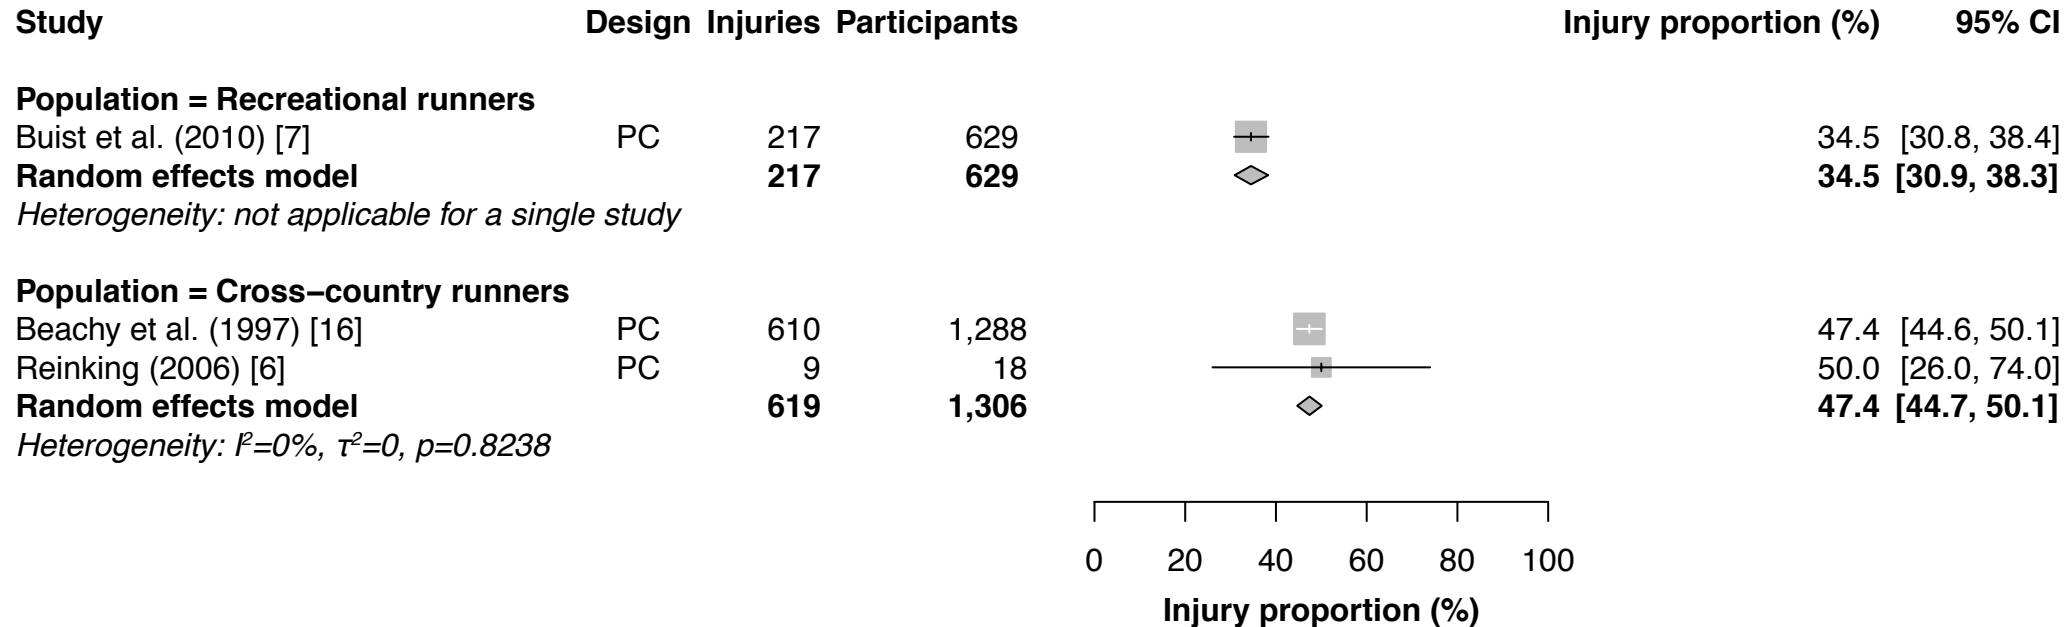

## Time-loss injuries during a 1-year follow-up/recall period

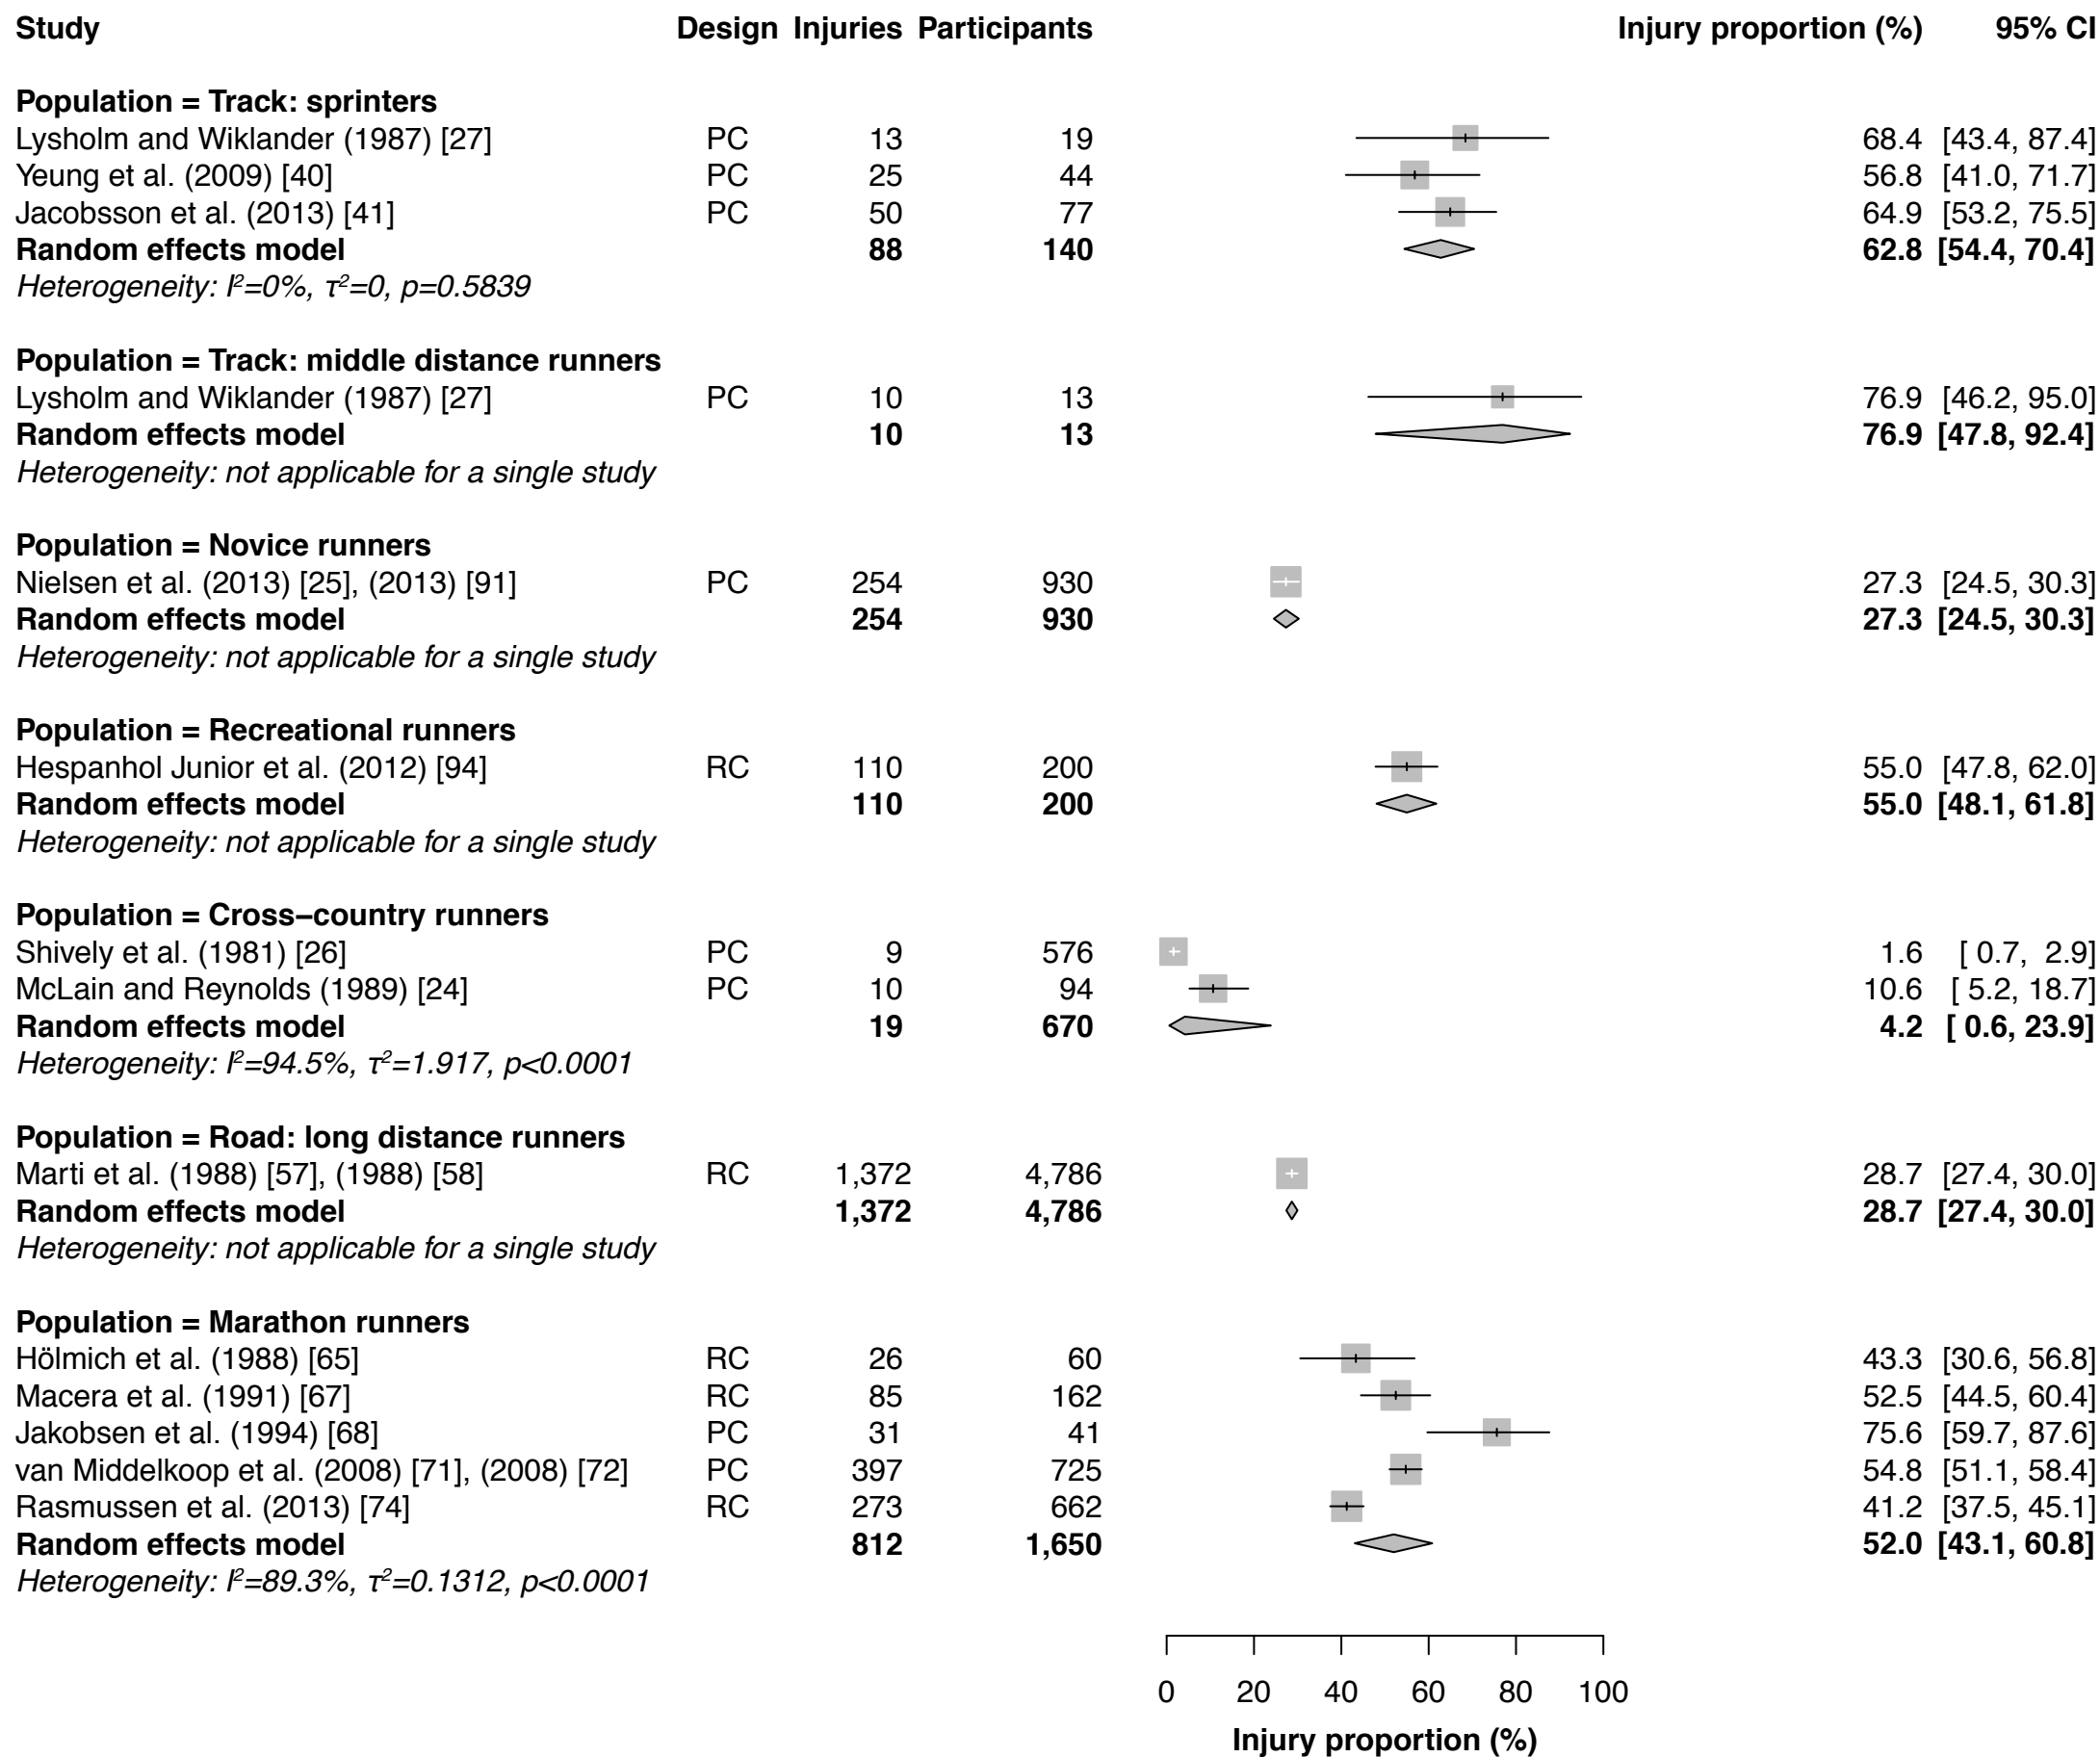

## Time-loss injuries during a long follow-up/recall period

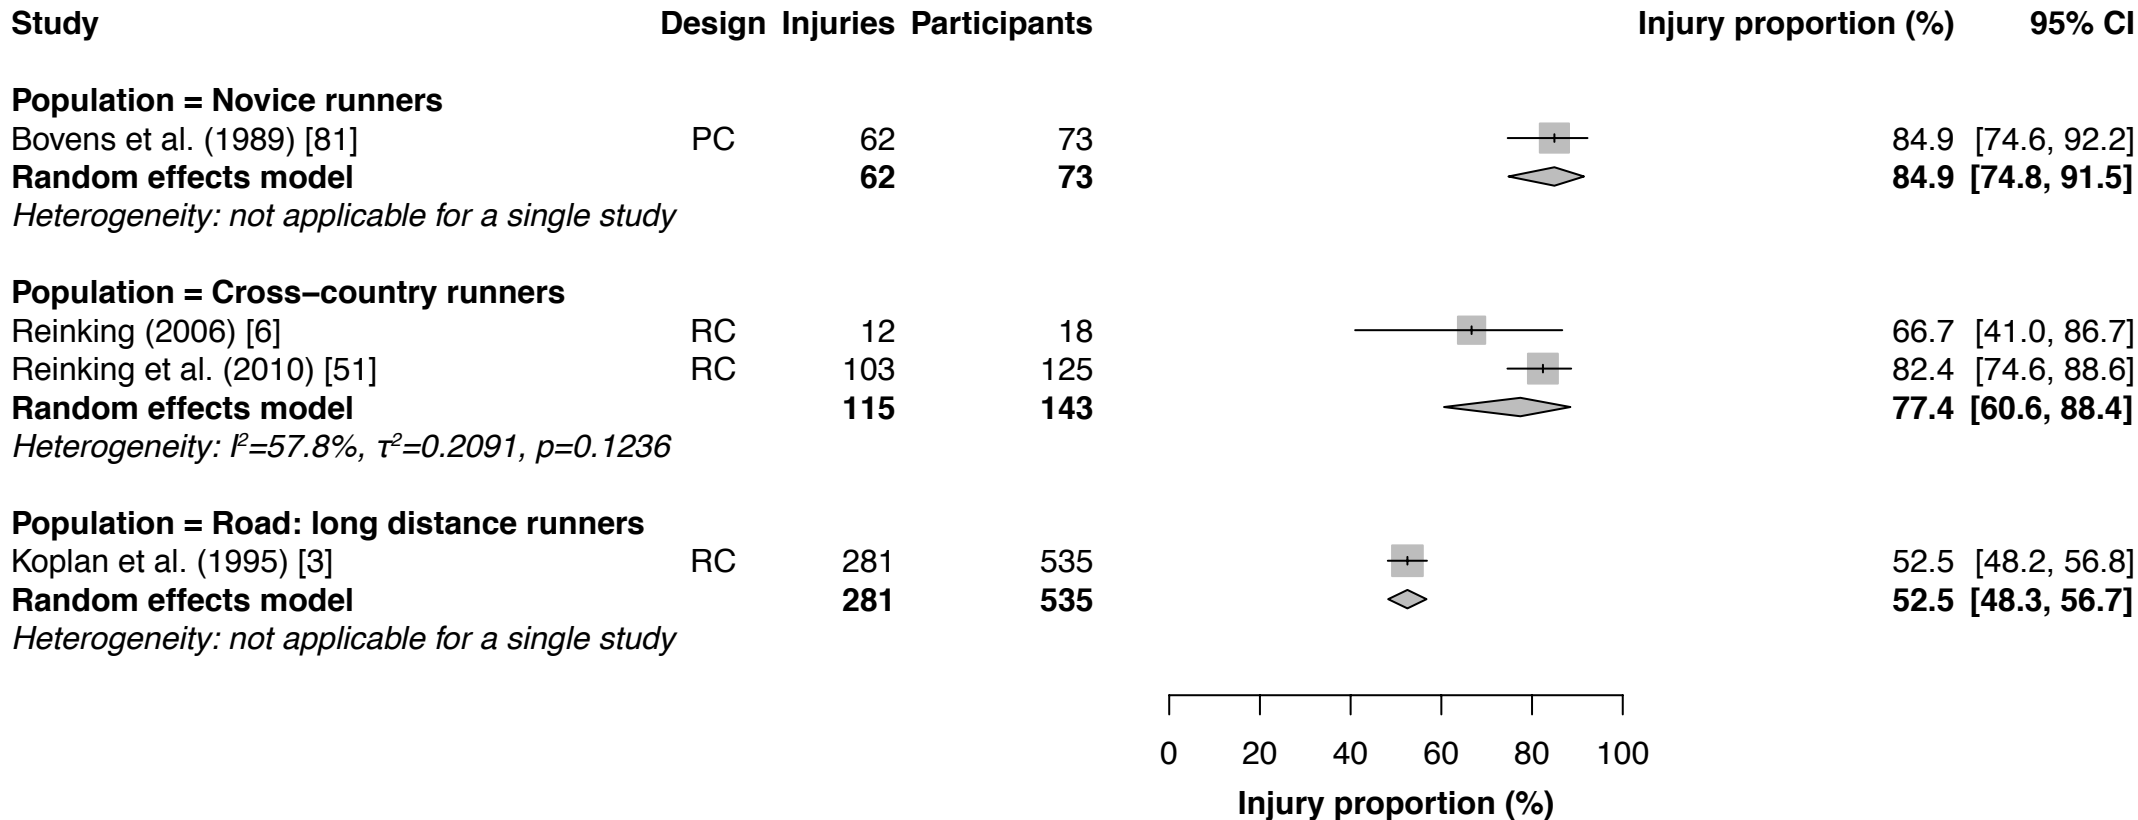

Supplement: 40279_2015_331_MOESM5_ESM.pdf [file 40279_2015_331_MOESM5_ESM.pdf]
