# Supplementary material for: What are the Differences in Injury Proportions Between Different Populations of Runners? A Systematic Review and Meta-Analysis
Source: PubMed Central journal article supplement (PMC4513221; doi:10.1007/s40279-015-0331-x), 2015-04-08
Supplement: 40279_2015_331_MOESM6_ESM.pdf [file 40279_2015_331_MOESM6_ESM.pdf]

**Electronic Supplementary Material Appendix S6. Site-specific injury proportions (%) for each population of runners**

| Study                         | Population     | Time period | Injury definition | Injury site |       |           |      |           |            |                                |         |                         | Number of injuries |
|-------------------------------|----------------|-------------|-------------------|-------------|-------|-----------|------|-----------|------------|--------------------------------|---------|-------------------------|--------------------|
|                               |                |             |                   | Foot        | Ankle | Lower leg | Knee | Upper leg | Hip/pelvis | LEX not possible to categorize | Not LEX | Other sites, not stated |                    |
| D'Souza [18]                  | Track sprint   | None        | TL                | 22.2        | 0.0   | 18.5      | 7.4  | 37.0      | 11.1       |                                | 29.6    |                         | 27                 |
| Jacobsson et al. [41]         | Track sprint   | Year        | TL                |             |       |           |      | 32.0      | 10.7       | 53.3                           | 4.1     |                         | 122                |
| D'Souza [18]                  | Track middle   | Year        | TL                | 6.7         | 20.0  | 46.7      | 20.0 | 13.3      | 6.7        |                                | 13.4    |                         | 15                 |
| Bovens et al. [81]            | Novice         | Long        | TL                | 5.7         | 12.1  | 32.2      | 24.7 | 6.3       | 11.5       |                                | 7.5     |                         | 174                |
| Buist et al. [82, 83]         | Novice         | Short       | TL                |             |       | 40.0      | 37.0 | 4.0       | 9.0        | 10.0                           |         |                         | 100                |
| van Ginckel et al. [86]       | Novice         | Short       | TL                | 2.9         | 10.1  | 33.3      | 36.2 | 5.8       | 8.7        |                                | 2.9     |                         | 69                 |
| Buist et al. [7]              | Recreational   | Short       | TL                | 3.7         | 5.5   | 33.7      | 29.4 | 3.1       | 8.0        |                                | 4.9     | 11.7                    | 163                |
| Lopes et al. [93]             | Recreational   | None        | PRI               |             |       |           | 27.8 | 8.8       | 11.0       | 30.8                           | 12.8    | 8.8                     | 227                |
| Hespanhol Junior et al. [94]  | Recreational   | Year        | TL                | 14.5        | 11.8  | 20.0      | 27.3 | 8.2       | 9.1        |                                | 9.1     |                         | 110                |
| Hespanhol Junior et al. [95]  | Recreational   | Short       | TL                | 16.7        | 7.1   | 3.6       | 19.0 | 14.3      | 8.4        | 14.3                           | 16.7    |                         | 84                 |
| Rauh et al. [42]              | Cross-country  | Short       | TL                | 9.6         | 19.2  | 29.2      | 22.0 | 7.4       | 6.8        |                                | 3.4     | 2.4                     | 795                |
| Rauh et al. [44, 45]          | Cross-country  | Short       | TL                |             |       | 36.0      | 25.3 | 17.3      |            | 18.0                           | 3.3     |                         | 148                |
| Hughes et al. [54]            | Road long      | Event       | TL                | 14.7        | 8.6   | 16.9      | 35.2 | 9.2       | 10.0       |                                | 5.5     |                         | 361                |
| Jacobs and Berson [55]        | Road long      | Long        | TL                | 7.7         | 18.3  | 32.5      | 31.7 | 9.9       |            |                                |         |                         | 142                |
| Yeung et al. [36]             | Road long      | Event       | MA                | 10.0        | 3.3   |           | 23.3 | 30.0      |            | 26.7                           | 6.7     |                         | 30                 |
| Caldwell [61]                 | Marathon       | Event       | TL                | 30.9        | 1.8   | 21.8      | 27.3 | 7.3       | 9.1        |                                | 1.8     |                         | 55                 |
| Maughan and Miller [62]       | Marathon       | Short       | TL                | 13.4        | 12.0  | 23.5      | 31.5 | 8.6       | 5.3        |                                | 4.9     | 0.8                     | 358                |
| Satterthwaite et al. [69, 96] | Marathon       | Event       | PRI               | 22.1        |       | 23.4      | 12.7 | 41.8      |            |                                |         |                         | 1,812              |
| Satterthwaite et al. [69, 96] | Marathon       | Short       | PRI               | 11.9        |       | 25.1      | 15.4 | 47.7      |            |                                |         |                         | 1,425              |
| Yeung et al. [36]             | Marathon       | Event       | MA                | 2.8         | 7.0   |           | 9.9  | 33.8      |            | 43.7                           | 2.8     |                         | 71                 |
| van Middelkoop et al. [71]    | Marathon       | Event       | TL                | 21.4        | 3.3   | 34.0      | 21.3 | 14.0      | 6.0        |                                |         |                         | 150                |
| van Middelkoop et al. [71]    | Marathon       | Year        | TL                | 14.3        | 6.0   | 35.6      | 22.2 | 8.9       | 12.9       |                                |         |                         | 550                |
| Ogwumike and Adeniyi [97]     | Marathon       | Event       | MA                | 14.2        | 17.7  | 17.7      | 13.8 | 31.9      | 4.3        |                                | 0.4     |                         | 254                |
| Rasmussen et al. [74]         | Marathon       | Year        | TL                |             |       | 19.1      | 32.4 | 5.9       | 2.9        | 32.4                           | 4.4     | 2.9                     | 68                 |
| Fallon [76]                   | Ultra marathon | Event       | MA                | 6.3         | 28.1  | 14.1      | 31.3 | 10.9      |            |                                | 9.5     |                         | 64                 |
| Bishop and Fallon [77]        | Ultra marathon | Event       | MA                | 5.6         | 36.1  | 11.1      | 19.4 | 11.1      | 11.1       |                                | 5.6     |                         | 36                 |
| Scheer and Murray [79]        | Ultra marathon | Event       | MA                |             | 27.3  | 13.6      | 40.9 | 4.5       | 13.6       |                                |         |                         | 22                 |

TL: time-loss injury, MA: medical attention injury, PRI: pain-related injury, LEX: lower extremity
